# Supplementary material for: Modulation of the properties of pyrrolo[3,4-c]pyrrole-1,4-dione based polymers containing 2,5-di(2-thienyl)pyrrole derivatives with different substitutions on the pyrrole unit
Source: Royal Society of Chemistry journal article supplement (doi:10.1039/c5nj00606f), 2015-01-01
Supplement: c5nj00606f1.pdf [file c5nj00606f1.pdf]

## **Supporting Information**

Modulation of the Properties of Pyrrolo[3,4-c]pyrrole-1,4-dione Based Polymers  
Containing 2,5-Di(2-thienyl)pyrrole Derivatives With Different Substitutions on  
the Pyrrole Unit

*Rajalingam Agneeswari,<sup>a</sup> Insoo Shin,<sup>b</sup> Vellaiappillai Tamilavan,<sup>a</sup> Dal Yong Lee,<sup>b</sup> Shinuk Cho,<sup>c</sup>  
Youngup Jin,<sup>d</sup> Sung Heum Park,<sup>\*b</sup> and Myung Ho Hyun<sup>\*a</sup>*

<sup>a</sup> *Department of Chemistry, Chemistry Institute for Functional Materials, Pusan National University, Busan 690-735, Republic of Korea*

<sup>b</sup> *Department of Physics, Pukyong National University, Busan 608-737, Republic of Korea*

<sup>c</sup> *Department of Physics and EHSRC, University of Ulsan, Ulsan 680-749, Republic of Korea*

<sup>d</sup> *Department of Industrial Chemistry, Pukyong National University, Busan 608-739, Republic of Korea*

**Fig. S1.** The XRD images of the polymers such as P(DKPP-TPTH), P(DKPP-TPTE), P(DKPP-TPTA), and P(DKPP-TPTI) as a film state. ----- 4

**Fig. S2.**  $J-V$  Curves of the PSCs prepared from P(DKPP-TPTH):PC<sub>70</sub>BM blend at different ratios (a), concentrations for P(DKPP-TPTH):PC<sub>70</sub>BM (1:2 wt%)+3vol% DIO blend (b), solvents for P(DKPP-TPTH):PC<sub>70</sub>BM (1:2 wt%) blend (c) and additives for P(DKPP-TPTH):PC<sub>70</sub>BM (1:2 wt%) blend (d). Note: All PSCs were prepared with 22 mg/ml blend solution expect for that made from 11 mg/ml blend solution in dichlorobenzene (DCB) and except for that made from chlorobenzene (CB). ----- 5

**Fig. S3.**  $J-V$  Curves of the PSCs prepared from P(DKPP-TPTE):PC<sub>70</sub>BM blend at different ratios (a) and concentrations for P(DKPP-TPTE):PC<sub>70</sub>BM (1:2 wt%) (b). Note: All PSCs were prepared with 22 mg/ml blend solution expect for that made from 33 mg/ml blend solution in dichlorobenzene (DCB). ----- 7

**Fig. S4.**  $J-V$  Curves of the PSCs prepared from P(DKPP-TPTA):PC<sub>70</sub>BM blend at different ratios (a) and concentrations for P(DKPP-TPTA):PC<sub>70</sub>BM (1:3 wt%) (b). Note: All PSCs were prepared with 22 mg/ml blend solution expect for that made from 33 mg/ml blend solution in dichlorobenzene (DCB). ----- 9

**Fig. S5.**  $J-V$  Curves of the PSCs prepared from P(DKPP-TPTI):PC<sub>70</sub>BM blend at different ratios (a), concentrations for P(DKPP-TPTI):PC<sub>70</sub>BM (1:3 wt%) blend (b), solvents for P(DKPP-TPTI):PC<sub>70</sub>BM (1:3 wt%) blend (c), additives (2 vol%) for P(DKPP-TPTI):PC<sub>70</sub>BM (1:3 wt%) blend (d) and thermal post annealing for P(DKPP-TPTI):PC<sub>70</sub>BM (1:3 wt%) blend (e). Note: All

PSCs were prepared with 22 mg/ml blend solution expect for that made from 33 mg/ml blend solution in dichlorobenzene (DCB). -----11

**Table S1.** Photovoltaic properties of the PSCs made from P(DKPP-TPTH) by using the configuration of ITO/PEDOT:PSS/P(DKPP-TPTH):PC<sub>70</sub>BM/Al. ----- 6

**Table S2.** Photovoltaic properties of the PSCs made from P(DKPP-TPTE) by using the configuration of ITO/PEDOT:PSS/P(DKPP-TPTE):PC<sub>70</sub>BM/Al . ----- 8

**Table S3.** Photovoltaic properties of the PSCs made from P(DKPP-TPTA) by using the configuration of ITO/PEDOT:PSS/P(DKPP-TPTA):PC<sub>70</sub>BM/Al . ----- 10

**Table S1.** Photovoltaic properties of the PSCs made from P(DKPP-TPTI) by using the configuration of ITO/PEDOT:PSS/P(DKPP-TPTI):PC<sub>70</sub>BM/Al . ----- 12

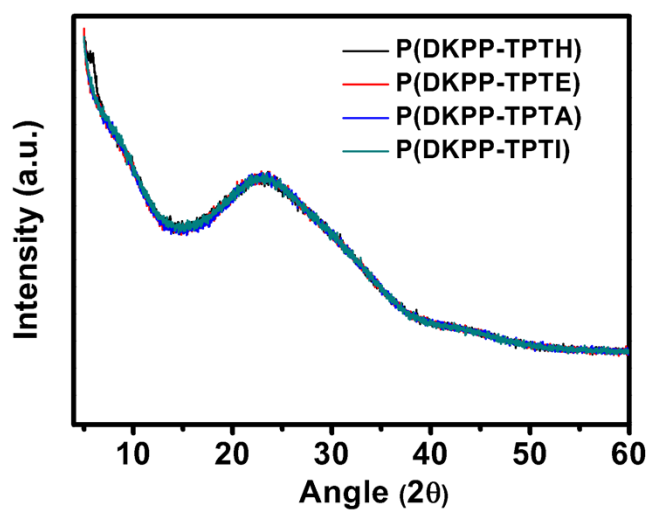

**Fig. S1.** The XRD images of the polymers such as P(DKPP-TPTH), P(DKPP-TPTE), P(DKPP-TPTA), and P(DKPP-TPTI) as a film state.

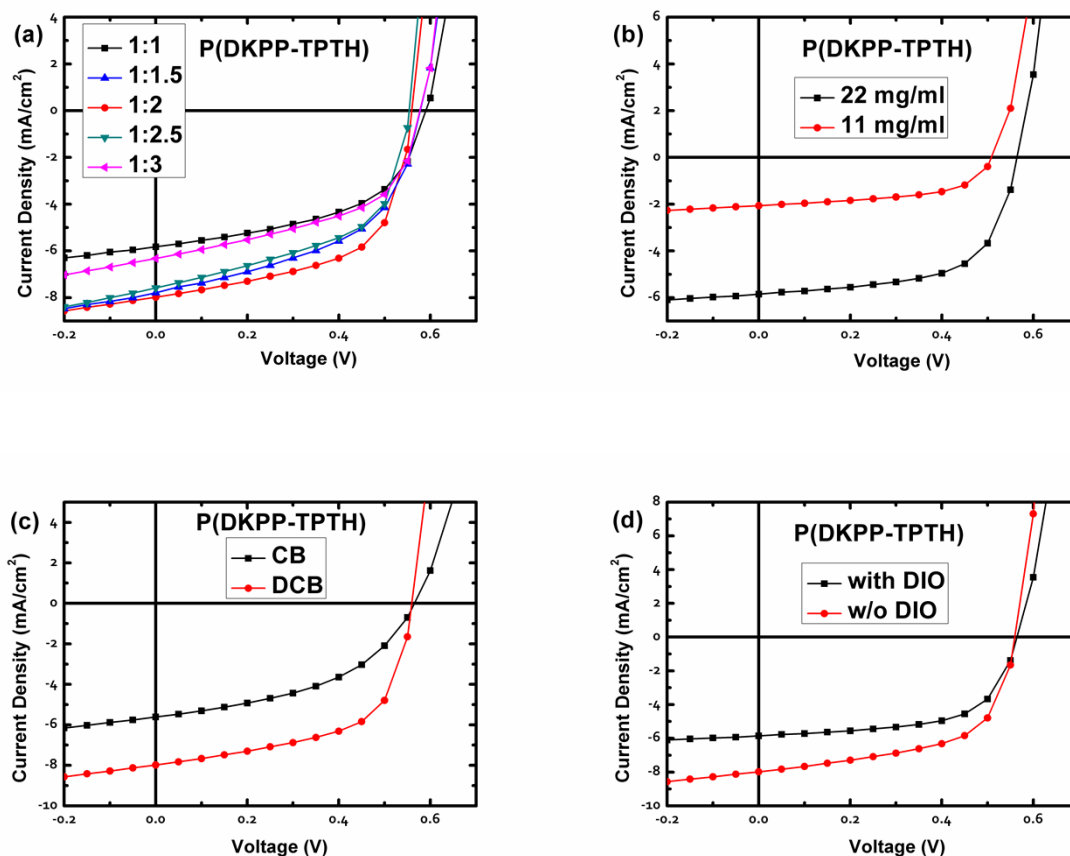

**Fig. S2.**  $J$ - $V$  Curves of the PSCs prepared from P(DKPP-TPTH):PC<sub>70</sub>BM blend at different ratios (a), concentrations for P(DKPP-TPTH):PC<sub>70</sub>BM (1:2 wt%)+3vol% DIO blend (b), solvents for P(DKPP-TPTH):PC<sub>70</sub>BM (1:2 wt%) blend (c) and additives for P(DKPP-TPTH):PC<sub>70</sub>BM (1:2 wt%) blend (d). Note: All PSCs were prepared with 22 mg/ml blend solution except for that made from 11 mg/ml blend solution in dichlorobenzene (DCB) and except for that made from chlorobenzene (CB).

**Table S1.** Photovoltaic properties of the PSCs made from P(DKPP-TPTH) by using the configuration of ITO/PEDOT:PSS/P(DKPP-TPTH):PC<sub>70</sub>BM/Al.

| Donor:Acceptor<br>Ratio | J <sub>sc</sub> (mA/cm <sup>2</sup> ) | V <sub>oc</sub> (V) | FF (%) | PCE (%) |
|-------------------------|---------------------------------------|---------------------|--------|---------|
| 1:1                     | 5.82                                  | 0.59                | 52     | 1.79    |
| 1:1.5                   | 7.79                                  | 0.59                | 50     | 2.28    |
| 1:2                     | 7.98                                  | 0.56                | 59     | 2.63    |
| 1:2.5                   | 7.59                                  | 0.55                | 53     | 2.23    |
| 1:3                     | 6.32                                  | 0.59                | 50     | 1.86    |
| Total<br>Concentration  | J <sub>sc</sub> (mA/cm <sup>2</sup> ) | V <sub>oc</sub> (V) | FF (%) | PCE (%) |
| 11 mg/ml                | 2.07                                  | 0.51                | 56     | 0.59    |
| 22 mg/ml                | 5.85                                  | 0.56                | 62     | 2.05    |
| Solvent                 | J <sub>sc</sub> (mA/cm <sup>2</sup> ) | V <sub>oc</sub> (V) | FF (%) | PCE (%) |
| CB                      | 5.61                                  | 0.57                | 46     | 1.46    |
| DCB                     | 7.98                                  | 0.56                | 59     | 2.63    |
| Additive                | J <sub>sc</sub> (mA/cm <sup>2</sup> ) | V <sub>oc</sub> (V) | FF (%) | PCE (%) |
| With DIO (3vol<br>%)    | 5.85                                  | 0.56                | 62     | 2.05    |
| Without DIO             | 7.98                                  | 0.56                | 59     | 2.63    |

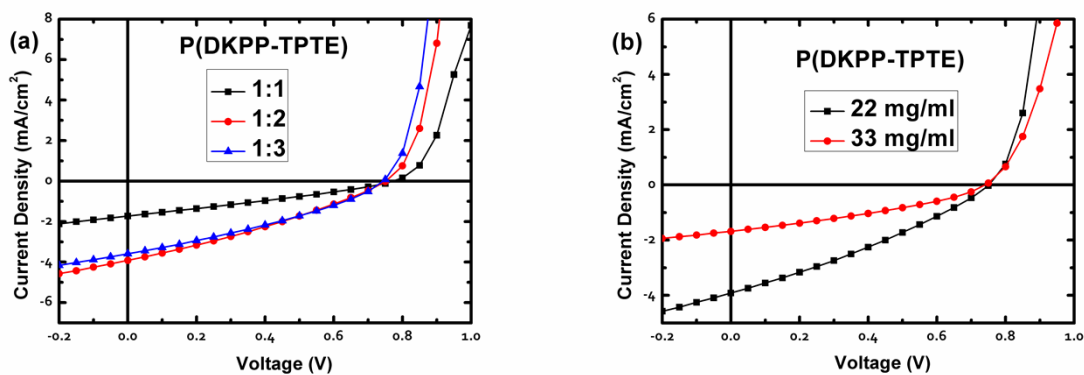

**Fig. S3.**  $J$ - $V$  Curves of the PSCs prepared from P(DKPP-TPTE):PC<sub>70</sub>BM blend at different ratios (a) and concentrations for P(DKPP-TPTE):PC<sub>70</sub>BM (1:2 wt%) (b). Note: All PSCs were prepared with 22 mg/ml blend solution expect for that made from 33 mg/ml blend solution in dichlorobenzene (DCB).

**Table S2.** Photovoltaic properties of the PSCs made from P(DKPP-TPTE) by using the configuration of ITO/PEDOT:PSS/P(DKPP-TPTE):PC<sub>70</sub>BM/Al.

| Donor:Acceptor |                                       |                     |        |         |
|----------------|---------------------------------------|---------------------|--------|---------|
| Ratio          | J <sub>sc</sub> (mA/cm <sup>2</sup> ) | V <sub>oc</sub> (V) | FF (%) | PCE (%) |
| 1:1            | 1.73                                  | 0.77                | 29     | 0.39    |
| 1:2            | 3.92                                  | 0.75                | 31     | 0.90    |
| 1:3            | 3.59                                  | 0.75                | 33     | 0.88    |
| Total          |                                       |                     |        |         |
| Concentration  | J <sub>sc</sub> (mA/cm <sup>2</sup> ) | V <sub>oc</sub> (V) | FF (%) | PCE (%) |
| 11 mg/ml       | 3.92                                  | 0.75                | 31     | 0.90    |
| 22 mg/ml       | 1.69                                  | 0.74                | 33     | 0.42    |



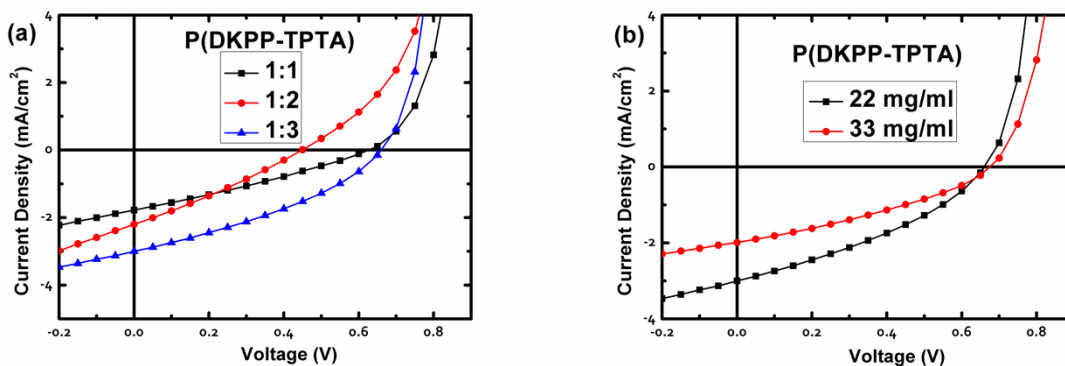

**Fig. S4.**  $J$ - $V$  Curves of the PSCs prepared from P(DKPP-TPTA):PC<sub>70</sub>BM blend at different ratios (a) and concentrations for P(DKPP-TPTA):PC<sub>70</sub>BM (1:3 wt%) (b). Note: All PSCs were prepared with 22 mg/ml blend solution expect for that made from 33 mg/ml blend solution in dichlorobenzene (DCB).

**Table S3.** Photovoltaic properties of the PSCs made from P(DKPP-TPTA) by using the configuration of ITO/PEDOT:PSS/P(DKPP-TPTA):PC<sub>70</sub>BM/Al.

| Donor:Acceptor<br>Ratio | J <sub>sc</sub> (mA/cm <sup>2</sup> ) | V <sub>oc</sub> (V) | FF (%) | PCE (%) |
|-------------------------|---------------------------------------|---------------------|--------|---------|
| 1:1                     | 1.78                                  | 0.64                | 29     | 0.32    |
| 1:2                     | 2.20                                  | 0.45                | 28     | 0.28    |
| 1:3                     | 3.00                                  | 0.66                | 35     | 0.70    |
| Total<br>Concentration  | J <sub>sc</sub> (mA/cm <sup>2</sup> ) | V <sub>oc</sub> (V) | FF (%) | PCE (%) |
| 22mg/ml                 | 3.00                                  | 0.66                | 35     | 0.70    |
| 33mg/ml                 | 1.99                                  | 0.67                | 34     | 0.45    |

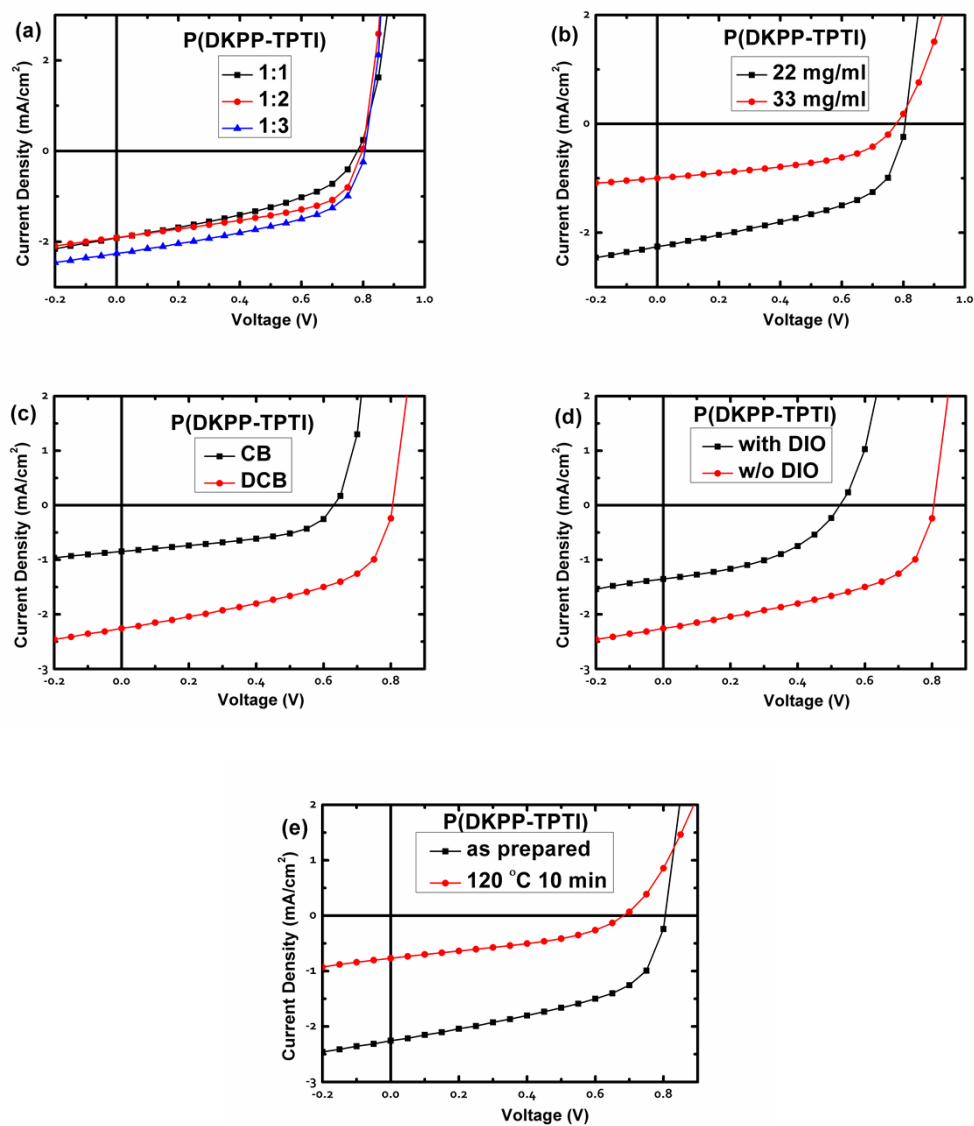

**Fig. S5.**  $J$ - $V$  Curves of the PSCs prepared from P(DKPP-TPTI):PC<sub>70</sub>BM blend at different ratios (a), concentrations for P(DKPP-TPTI):PC<sub>70</sub>BM (1:3 wt%) blend (b), solvents for P(DKPP-TPTI):PC<sub>70</sub>BM (1:3 wt%) blend (c), additives (2 vol%) for P(DKPP-TPTI):PC<sub>70</sub>BM (1:3 wt%) blend (d) and thermal post annealing for P(DKPP-TPTI):PC<sub>70</sub>BM (1:3 wt%) blend (e). Note: All PSCs were prepared with 22 mg/ml blend solution except for that made from 33 mg/ml blend solution in dichlorobenzene (DCB).

**Table S4.** Photovoltaic properties of the PSCs made from P(DKPP-TPTI) by using the configuration of ITO/PEDOT:PSS/P(DKPP-TPTI):PC<sub>70</sub>BM/Al.

| Donor:Acceptor<br>Ratio    | J <sub>sc</sub> (mA/cm <sup>2</sup> ) | V <sub>oc</sub> (V) | FF (%) | PCE (%) |
|----------------------------|---------------------------------------|---------------------|--------|---------|
| 1:1                        | 1.92                                  | 0.79                | 41     | 0.63    |
| 1:2                        | 1.91                                  | 0.80                | 51     | 0.78    |
| 1:3                        | 2.26                                  | 0.81                | 50     | 0.91    |
| Total<br>Concentration     | J <sub>sc</sub> (mA/cm <sup>2</sup> ) | V <sub>oc</sub> (V) | FF (%) | PCE (%) |
| 22mg/ml                    | 2.26                                  | 0.81                | 50     | 0.91    |
| 33mg/ml                    | 1.00                                  | 0.78                | 47     | 0.37    |
| Solvent                    | J <sub>sc</sub> (mA/cm <sup>2</sup> ) | V <sub>oc</sub> (V) | FF (%) | PCE (%) |
| CB                         | 0.85                                  | 0.64                | 48     | 0.26    |
| DCB                        | 2.26                                  | 0.81                | 50     | 0.91    |
| Additive                   | J <sub>sc</sub> (mA/cm <sup>2</sup> ) | V <sub>oc</sub> (V) | FF (%) | PCE (%) |
| Without DIO                | 2.26                                  | 0.81                | 50     | 0.91    |
| With DIO (3<br>vol%)       | 1.35                                  | 0.52                | 44     | 0.31    |
| Post Annealing             | J <sub>sc</sub> (mA/cm <sup>2</sup> ) | V <sub>oc</sub> (V) | FF (%) | PCE (%) |
| As Prepared                | 2.26                                  | 0.81                | 50     | 0.91    |
| Post annealing<br>(120 °C) | 0.77                                  | 0.69                | 39     | 0.21    |
